# Supplementary material
Source: MDPI journal article supplement (https://www.mdpi.com/2072-4292/10/6/910)
Supplement: s1 [file s1]

# Fast and Automatic Data-Driven Thresholding for Inundation Mapping with Sentinel-2 Data

Georgios A. Kordelas, Ioannis Manakos, David Aragonés, Ricardo Díaz-Delgado and Javier Bustamante

This supplementary material supports the main text as follows:

## Supplementary 3. Confusion Matrices.

This supplementary contains the confusion matrices based on which the accuracy assessment results in Tables 4-8 of the main manuscript and Tables 1-5 of the Supplementary 2 (Sup2) were produced.

### 1. Results for Complete Area

The following table contains the confusion matrices used to generate the results given in Table 4 of main manuscript and Table 1 of Sup2. The confusion matrices of both Table 4 and Table 1, are given in the same cells, with the results used to produce Table 1 given into parentheses. The results that are finally transferred to Table 4 and Table 1 are denoted with bold. In the first row is given the applied approach and the considered study area and in the left column the date.

| Unsupervised – Complete area |           |                     |                                    |                                    |                        |                                                | Supervised – Complete area |                     |                                    |                                    |                        |                                                |
|------------------------------|-----------|---------------------|------------------------------------|------------------------------------|------------------------|------------------------------------------------|----------------------------|---------------------|------------------------------------|------------------------------------|------------------------|------------------------------------------------|
| 29/12/2015                   |           |                     | Landsat Reference                  |                                    |                        | User's Accuracy                                |                            |                     | Landsat Reference                  |                                    |                        | User's Accuracy                                |
|                              |           | # pixels            | Water                              | Non-water                          | Overalls               |                                                |                            | # pixels            | Water                              | Non-water                          | Overalls               |                                                |
|                              | S2 Result | Water               | 2689871<br>(2785051)               | 189766<br>(306038)                 | 2879637<br>(3091089)   | <b>93.41%</b><br>( <b>90.10%</b> )             | S2 Result                  | Water               | 2923231<br>(3087697)               | 268930<br>(557281)                 | 3192161<br>(3644978)   | <b>91.58%</b><br>( <b>84.71%</b> )             |
|                              |           | Non-water           | 255097<br>(405860)                 | 23543953<br>(24070686)             | 23799050<br>(24476546) | <b>98.93%</b><br>( <b>98.34%</b> )             |                            | Non-water           | 21737<br>(103214)                  | 23464789<br>(23819443)             | 23486526<br>(23922657) | <b>99.91%</b><br>( <b>99.57%</b> )             |
|                              |           | Overalls            | 2944968<br>(3190911)               | 23733719<br>(24376724)             | 26678687<br>(27567635) |                                                |                            | Overalls            | 2944968<br>(3190911)               | 23733719<br>(24376724)             | 26678687<br>(27567635) |                                                |
|                              |           | Producer's Accuracy | <b>91.34%</b><br>( <b>87.28%</b> ) | <b>99.20%</b><br>( <b>98.74%</b> ) |                        | Overall:<br><b>98.33%</b><br>( <b>97.42%</b> ) |                            | Producer's Accuracy | <b>99.26%</b><br>( <b>96.77%</b> ) | <b>98.87%</b><br>( <b>97.71%</b> ) |                        | Overall:<br><b>98.91%</b><br>( <b>97.60%</b> ) |
| 06/06/2016                   |           |                     | Landsat Reference                  |                                    |                        | User's Accuracy                                |                            |                     | Landsat Reference                  |                                    |                        | User's Accuracy                                |
|                              |           | # pixels            | Water                              | Non-water                          | Overalls               |                                                |                            | # pixels            | Water                              | Non-water                          | Overalls               |                                                |
|                              | S2 Result | Water               | 2503635<br>(2732019)               | 146744<br>(308357)                 | 2650379<br>(3040376)   | <b>94.46%</b><br>( <b>89.86%</b> )             | S2 Result                  | Water               | 2660458<br>(2997349)               | 204828<br>(531073)                 | 2865286<br>(3528422)   | <b>92.85%</b><br>( <b>84.95%</b> )             |
|                              |           | Non-water           | 182466<br>(393828)                 | 23444660<br>(24133436)             | 23627126<br>(24527264) | <b>99.23%</b><br>( <b>98.39%</b> )             |                            | Non-water           | 25643<br>(128498)                  | 23386576<br>(23910720)             | 23412219<br>(24039218) | <b>99.89%</b><br>( <b>99.47%</b> )             |
|                              |           | Overalls            | 2686101<br>(3125847)               | 23591404<br>(24441793)             | 26277505<br>(27567640) |                                                |                            | Overalls            | 2686101<br>(3125847)               | 23591404<br>(24441793)             | 26277505<br>(27567640) |                                                |
|                              |           | Producer's Accuracy | <b>93.21%</b><br>( <b>87.40%</b> ) | <b>99.38%</b><br>( <b>98.74%</b> ) |                        | Overall:<br><b>98.75%</b><br>( <b>97.45%</b> ) |                            | Producer's Accuracy | <b>99.05%</b><br>( <b>95.89%</b> ) | <b>99.13%</b><br>( <b>97.83%</b> ) |                        | Overall:<br><b>99.12%</b><br>( <b>97.61%</b> ) |
| 16/07/2016                   |           |                     | Landsat Reference                  |                                    |                        | User's Accuracy                                |                            |                     | Landsat Reference                  |                                    |                        | User's Accuracy                                |
|                              |           | # pixels            | Water                              | Non-water                          | Overalls               |                                                |                            | # pixels            | Water                              | Non-water                          | Overalls               |                                                |
|                              | S2 Result | Water               | 1744229<br>(2002915)               | 784510<br>(1099220)                | 2528739<br>(3102135)   | <b>68.98%</b><br>( <b>64.57%</b> )             | S2 Result                  | Water               | 1914177<br>(2222215)               | 143662<br>(449245)                 | 2057839<br>(2671460)   | <b>93.02%</b><br>( <b>83.18%</b> )             |
|                              |           | Non-water           | 193079<br>(355186)                 | 23677073<br>(24110319)             | 23870152<br>(24465505) | <b>99.19%</b><br>( <b>98.55%</b> )             |                            | Non-water           | 23131<br>(135886)                  | 24317921<br>(24760294)             | 24341052<br>(24896180) | <b>99.90%</b><br>( <b>99.45%</b> )             |

|            |           |                     |                                  |                                  |                        |                                              |           |                     |                                  |                                  |                        |                                              |
|------------|-----------|---------------------|----------------------------------|----------------------------------|------------------------|----------------------------------------------|-----------|---------------------|----------------------------------|----------------------------------|------------------------|----------------------------------------------|
|            |           | Overalls            | 1937308<br>(2358101)             | 24461583<br>(25209539)           | 26398891<br>(27567640) |                                              |           | Overalls            | 1937308<br>(2358101)             | 24461583<br>(25209539)           | 26398891<br>(27567640) |                                              |
|            |           | Producer's Accuracy | <b>90.03%</b><br><b>(84.94%)</b> | <b>96.79%</b><br><b>(95.64%)</b> |                        | Overall:<br><b>96.30%</b><br><b>(94.72%)</b> |           | Producer's Accuracy | <b>98.81%</b><br><b>(94.24%)</b> | <b>99.41%</b><br><b>(98.22%)</b> |                        | Overall:<br><b>99.37%</b><br><b>(97.88%)</b> |
| 25/08/2016 |           |                     | Landsat Reference                |                                  |                        | User's Accuracy                              |           |                     | Landsat Reference                |                                  |                        | User's Accuracy                              |
|            |           | # pixels            | Water                            | Non-water                        | Overalls               |                                              |           |                     | # pixels                         | Water                            | Non-water              | Overalls                                     |
|            | S2 Result | Water               | 1739924<br>(2133943)             | 718031<br>(1244784)              | 2457955<br>(3378727)   | <b>70.79%</b><br><b>(63.16%)</b>             | S2 Result | Water               | 1803622<br>(2223138)             | 320690<br>(847698)               | 2124312<br>(3070836)   | <b>84.90%</b><br><b>(72.40%)</b>             |
|            |           | Non-water           | 95930<br>(217176)                | 23618414<br>(23971737)           | 23714344<br>(24188913) | <b>99.60%</b><br><b>(99.10%)</b>             |           | Non-water           | 32232<br>(127981)                | 24015755<br>(24368823)           | 24047987<br>(24496804) | <b>99.87%</b><br><b>(99.48%)</b>             |
|            |           | Overalls            | 1835854<br>(2351119)             | 24336445<br>(25216521)           | 26172299<br>(27567640) |                                              |           | Overalls            | 1835854<br>(2351119)             | 24336445<br>(25216521)           | 26172299<br>(27567640) |                                              |
|            |           | Producer's Accuracy | <b>94.77%</b><br><b>(90.76%)</b> | <b>97.05%</b><br><b>(95.06%)</b> |                        | Overall:<br><b>96.89%</b><br><b>(94.70%)</b> |           | Producer's Accuracy | <b>98.24%</b><br><b>(94.56%)</b> | <b>98.68%</b><br><b>(96.64%)</b> |                        | Overall:<br><b>98.65%</b><br><b>(96.46%)</b> |
| 04/10/2016 |           |                     | Landsat Reference                |                                  |                        | User's Accuracy                              |           |                     | Landsat Reference                |                                  |                        | User's Accuracy                              |
|            |           | # pixels            | Water                            | Non-water                        | Overalls               |                                              |           |                     | # pixels                         | Water                            | Non-water              | Overalls                                     |
|            | S2 Result | Water               | 655814<br>(709941)               | 19198<br>(49273)                 | 675012<br>(759214)     | <b>97.16%</b><br><b>(93.51%)</b>             | S2 Result | Water               | 710334<br>(806956)               | 31294 (112776)                   | 741628<br>(919732)     | <b>95.78%</b><br><b>(87.74%)</b>             |
|            |           | Non-water           | 66779<br>(179290)                | 26335218<br>(26629136)           | 26401997<br>(26808426) | <b>99.75%</b><br><b>(99.33%)</b>             |           | Non-water           | 12259<br>(82275)                 | 26323122<br>(26565633)           | 26335381<br>(26647908) | <b>99.95%</b><br><b>(99.69%)</b>             |
|            |           | Overalls            | 722593<br>(889231)               | 26354416<br>(26678409)           | 27077009<br>(27567640) |                                              |           | Overalls            | 722593<br>(889231)               | 26354416<br>(26678409)           | 27077009<br>(27567640) |                                              |
|            |           | Producer's Accuracy | <b>90.76%</b><br><b>(79.84%)</b> | <b>99.93%</b><br><b>(99.82%)</b> |                        | Overall:<br><b>99.68%</b><br><b>(99.17%)</b> |           | Producer's Accuracy | <b>98.30%</b><br><b>(90.95%)</b> | <b>99.88%</b><br><b>(99.58%)</b> |                        | Overall:<br><b>99.84%</b><br><b>(99.29%)</b> |
| 23/12/2016 |           |                     | Landsat Reference                |                                  |                        | User's Accuracy                              |           |                     | Landsat Reference                |                                  |                        | User's Accuracy                              |
|            |           | # pixels            | Water                            | Non-water                        | Overalls               |                                              |           |                     | # pixels                         | Water                            | Non-water              | Overalls                                     |
|            | S2 Result | Water               | 4870350<br>(4975069)             | 212395<br>(372538)               | 5082745<br>(5347607)   | <b>95.82%</b><br><b>(93.03%)</b>             | S2 Result | Water               | 5643309<br>(5924871)             | 475522<br>(1135457)              | 6118831<br>(7060328)   | <b>92.23%</b><br><b>(83.92%)</b>             |
|            |           | Non-water           | 852458<br>(1152975)              | 19755316<br>(21061363)           | 20607774<br>(22214338) | <b>95.86%</b><br><b>(94.81%)</b>             |           | Non-water           | 79499<br>(203173)                | 19492189<br>(20298444)           | 19571688<br>(20501617) | <b>99.59%</b><br><b>(99.01%)</b>             |
|            |           | Overalls            | 5722808<br>(6128044)             | 19967711<br>(21433901)           | 25690519<br>(27561945) |                                              |           | Overalls            | 5722808<br>(6128044)             | 19967711<br>(21433901)           | 25690519<br>(27561945) |                                              |
|            |           | Producer's Accuracy | <b>85.10%</b><br><b>(81.19%)</b> | <b>98.94%</b><br><b>(98.26%)</b> |                        | Overall:<br><b>95.86%</b><br><b>(94.47%)</b> |           | Producer's Accuracy | <b>98.61%</b><br><b>(96.68%)</b> | <b>97.62%</b><br><b>(94.70%)</b> |                        | Overall:<br><b>97.84%</b><br><b>(95.14%)</b> |
| 01/06/2017 |           |                     | Landsat Reference                |                                  |                        | User's Accuracy                              |           |                     | Landsat Reference                |                                  |                        | User's Accuracy                              |
|            |           | # pixels            | Water                            | Non-water                        | Overalls               |                                              |           |                     | # pixels                         | Water                            | Non-water              | Overalls                                     |
|            | S2 Result | Water               | 3976759<br>(4126523)             | 199999<br>(343467)               | 4176758<br>(4469990)   | <b>95.21%</b><br><b>(92.32%)</b>             | S2 Result | Water               | 4273009<br>(4529417)             | 273866<br>(599516)               | 4546875<br>(5128933)   | <b>93.98%</b><br><b>(88.31%)</b>             |
|            |           | Non-water           | 322836<br>(521368)               | 21967110<br>(22576282)           | 22289946<br>(23097650) | <b>98.55%</b><br><b>(97.74%)</b>             |           | Non-water           | 26586<br>(118474)                | 21893243<br>(22320233)           | 21919829<br>(22438707) | <b>99.88%</b><br><b>(99.47%)</b>             |
|            |           | Overalls            | 4299595<br>(4647891)             | 22167109<br>(22919749)           | 26466704<br>(27567640) |                                              |           | Overalls            | 4299595<br>(4647891)             | 22167109<br>(22919749)           | 26466704<br>(27567640) |                                              |
|            |           | Producer's Accuracy | <b>92.49%</b><br><b>(88.78%)</b> | <b>99.10%</b><br><b>(98.50%)</b> |                        | Overall:<br><b>98.02%</b><br><b>(96.86%)</b> |           | Producer's Accuracy | <b>99.38%</b><br><b>(97.45%)</b> | <b>98.76%</b><br><b>(97.38%)</b> |                        | Overall:<br><b>98.86%</b><br><b>(97.40%)</b> |

## 2. Results for Marshland

The following table contains the confusion matrices used to generate the results given in Table 5 of main manuscript and Table 2 of Sup2. The confusion matrices of both Table 5 and Table 2, are given in the same cells, with the results used to produce Table 2 given into parentheses. The results that are finally transferred to Table 5 and Table 2 are denoted with bold. In the first row is given the applied approach and the considered study area and in the left column the date.

| Unsupervised – Marshland |                     |                                  |                                  |                      |                                              |                                  | Supervised – Marshland           |                                  |                      |                                              |                      |                                  |  |
|--------------------------|---------------------|----------------------------------|----------------------------------|----------------------|----------------------------------------------|----------------------------------|----------------------------------|----------------------------------|----------------------|----------------------------------------------|----------------------|----------------------------------|--|
| 29/12/2015               |                     |                                  | Landsat Reference                |                      |                                              | User's Accuracy                  |                                  |                                  | Landsat Reference    |                                              |                      | User's Accuracy                  |  |
|                          |                     | # pixels                         | Water                            | Non-water            | Overalls                                     |                                  |                                  | # pixels                         | Water                | Non-water                                    | Overalls             |                                  |  |
|                          | S2 Result           | Water                            | 82023<br>(95612)                 | 525<br>(9952)        | 82548<br>(105564)                            | <b>99.36%</b><br><b>(90.57%)</b> | S2 Result                        | Water                            | 88407<br>(110641)    | 6897 (30391)                                 | 95304<br>(141032)    | <b>92.76%</b><br><b>(78.45%)</b> |  |
|                          |                     | Non-water                        | 7644<br>(24872)                  | 3014906<br>(3066881) | 3022550<br>(3091753)                         | <b>99.75%</b><br><b>(99.20%)</b> |                                  | Non-water                        | 1260<br>(9843)       | 3008534<br>(3046442)                         | 3009794<br>(3056285) | <b>99.96%</b><br><b>(99.68%)</b> |  |
|                          | Overalls            | 89667<br>(120484)                | 3015431<br>(3076833)             | 3105098<br>(3197317) |                                              | Overalls                         | 89667<br>(120484)                | 3015431<br>(3076833)             | 3105098<br>(3197317) |                                              |                      |                                  |  |
|                          | Producer's Accuracy | <b>91.48%</b><br><b>(79.36%)</b> | <b>99.98%</b><br><b>(99.68%)</b> |                      | Overall:<br><b>99.74%</b><br><b>(98.91%)</b> | Producer's Accuracy              | <b>98.59%</b><br><b>(91.83%)</b> | <b>99.77%</b><br><b>(99.01%)</b> |                      | Overall:<br><b>99.74%</b><br><b>(98.74%)</b> |                      |                                  |  |
| 06/06/2016               |                     |                                  | Landsat Reference                |                      |                                              | User's Accuracy                  |                                  |                                  | Landsat Reference    |                                              |                      | User's Accuracy                  |  |
|                          |                     | # pixels                         | Water                            | Non-water            | Overalls                                     |                                  |                                  | # pixels                         | Water                | Non-water                                    | Overalls             |                                  |  |
|                          | S2 Result           | Water                            | 599440<br>(666860)               | 1599<br>(36654)      | 601039<br>(703514)                           | <b>99.73%</b><br><b>(94.79%)</b> | S2 Result                        | Water                            | 653288<br>(759851)   | 13661<br>(100650)                            | 666949<br>(860501)   | <b>97.95%</b><br><b>(88.30%)</b> |  |
|                          |                     | Non-water                        | 58744<br>(128206)                | 2152846<br>(2365601) | 2211590<br>(2493807)                         | <b>97.34%</b><br><b>(94.86%)</b> |                                  | Non-water                        | 4896<br>(35215)      | 2140784<br>(2301605)                         | 2145680<br>(2336820) | <b>99.77%</b><br><b>(98.49%)</b> |  |
|                          | Overalls            | 658184<br>(795066)               | 2154445<br>(2402255)             | 2812629<br>(3197321) |                                              | Overalls                         | 658184<br>(795066)               | 2154445<br>(2402255)             | 2812629<br>(3197321) |                                              |                      |                                  |  |
|                          | Producer's Accuracy | <b>91.07%</b><br><b>(83.87%)</b> | <b>99.93%</b><br><b>(98.47%)</b> |                      | Overall:<br><b>97.85%</b><br><b>(94.84%)</b> | Producer's Accuracy              | <b>99.26%</b><br><b>(95.57%)</b> | <b>99.37%</b><br><b>(95.81%)</b> |                      | Overall:<br><b>99.34%</b><br><b>(95.75%)</b> |                      |                                  |  |
| 16/07/2016               |                     |                                  | Landsat Reference                |                      |                                              | User's Accuracy                  |                                  |                                  | Landsat Reference    |                                              |                      | User's Accuracy                  |  |
|                          |                     | # pixels                         | Water                            | Non-water            | Overalls                                     |                                  |                                  | # pixels                         | Water                | Non-water                                    | Overalls             |                                  |  |
|                          | S2 Result           | Water                            | 11893<br>(15939)                 | 2538<br>(5384)       | 14431<br>(21323)                             | <b>82.41%</b><br><b>(74.75%)</b> | S2 Result                        | Water                            | 12937<br>(18153)     | 575<br>(4575)                                | 13512<br>(22728)     | <b>95.74%</b><br><b>(79.87%)</b> |  |
|                          |                     | Non-water                        | 1509<br>(5625)                   | 3157810<br>(3170373) | 3159319<br>(3175998)                         | <b>99.95%</b><br><b>(99.82%)</b> |                                  | Non-water                        | 465<br>(3411)        | 3159773<br>(3171182)                         | 3160238<br>(3174593) | <b>99.99%</b><br><b>(99.89%)</b> |  |
|                          | Overalls            | 13402<br>(21564)                 | 3160348<br>(3175757)             | 3173750<br>(3197321) |                                              | Overalls                         | 13402<br>(21564)                 | 3160348<br>(3175757)             | 3173750<br>(3197321) |                                              |                      |                                  |  |
|                          | Producer's Accuracy | <b>88.74%</b><br><b>(73.91%)</b> | <b>99.92%</b><br><b>(99.83%)</b> |                      | Overall:<br><b>99.87%</b><br><b>(99.66%)</b> | Producer's Accuracy              | <b>96.53%</b><br><b>(84.18%)</b> | <b>99.98%</b><br><b>(99.86%)</b> |                      | Overall:<br><b>99.97%</b><br><b>(99.75%)</b> |                      |                                  |  |
| 25/08/2016               |                     |                                  | Landsat Reference                |                      |                                              | User's Accuracy                  |                                  |                                  | Landsat Reference    |                                              |                      | User's Accuracy                  |  |
|                          |                     | # pixels                         | Water                            | Non-water            | Overalls                                     |                                  |                                  | # pixels                         | Water                | Non-water                                    | Overalls             |                                  |  |
|                          | S2 Result           | Water                            | 3802<br>(6471)                   | 3151<br>(5612)       | 6953<br>(12083)                              | <b>54.68%</b><br><b>(53.55%)</b> | S2 Result                        | Water                            | 4114<br>(7682)       | 601<br>(3944)                                | 4715<br>(11626)      | <b>87.25%</b><br><b>(66.08%)</b> |  |
|                          |                     | Non-water                        | 415<br>(3273)                    | 3174630<br>(3181965) | 3175045<br>(3185238)                         | <b>99.99%</b><br><b>(99.90%)</b> |                                  | Non-water                        | 103<br>(2062)        | 3177180<br>(3183633)                         | 3177283<br>(3185695) | <b>99.99%</b><br><b>(99.94%)</b> |  |
|                          | Overalls            | 4217<br>(9744)                   | 3177781<br>(3187577)             | 3181998<br>(3197321) |                                              | Overalls                         | 4217<br>(9744)                   | 3177781<br>(3187577)             | 3181998<br>(3197321) |                                              |                      |                                  |  |
|                          | Producer's Accuracy | <b>90.16%</b><br><b>(66.41%)</b> | <b>99.90%</b><br><b>(99.82%)</b> |                      | Overall:<br><b>99.89%</b><br><b>(99.72%)</b> | Producer's Accuracy              | <b>97.56%</b><br><b>(78.84%)</b> | <b>99.98%</b><br><b>(99.88%)</b> |                      | Overall:<br><b>99.98%</b><br><b>(99.81%)</b> |                      |                                  |  |
| 04/10/2016               |                     |                                  | Landsat Reference                |                      |                                              | User's Accuracy                  |                                  |                                  | Landsat Reference    |                                              |                      | User's Accuracy                  |  |
|                          |                     | # pixels                         | Water                            | Non-water            | Overalls                                     |                                  |                                  | # pixels                         | Water                | Non-water                                    | Overalls             |                                  |  |
|                          | Result              | Water                            | 1788<br>(3366)                   | 75<br>(1870)         | 1863<br>(5236)                               | <b>95.97%</b><br><b>(64.29%)</b> | S2 Result                        | Water                            | 1900<br>(4527)       | 542<br>(3447)                                | 2442<br>(7974)       | <b>77.81%</b><br><b>(56.77%)</b> |  |
|                          |                     | Non-water                        | 138<br>(3007)                    | 3181653<br>(3189078) | 3181791<br>(3192085)                         | <b>99.99%</b><br><b>(99.91%)</b> |                                  | Non-water                        | 26<br>(1846)         | 3181186<br>(3187501)                         | 3181212<br>(3189347) | <b>99.99%</b><br><b>(99.94%)</b> |  |

|            |              |                        |                           |                           |                      |                                       |              |                        |                           |                           |                      |                                       |
|------------|--------------|------------------------|---------------------------|---------------------------|----------------------|---------------------------------------|--------------|------------------------|---------------------------|---------------------------|----------------------|---------------------------------------|
|            |              | Overalls               | 1926<br>(6373)            | 3181728<br>(3190948)      | 3183654<br>(3197321) |                                       |              | Overalls               | 1926<br>(6373)            | 3181728<br>(3190948)      | 3183654<br>(3197321) |                                       |
|            |              | Producer's<br>Accuracy | <b>92.83%</b><br>(52.82%) | <b>99.99%</b><br>(99.94%) |                      | Overall:<br><b>99.99%</b><br>(99.85%) |              | Producer's<br>Accuracy | <b>98.65%</b><br>(71.03%) | <b>99.98%</b><br>(99.89%) |                      | Overall:<br><b>99.98%</b><br>(99.83%) |
| 23/12/2016 |              |                        | Landsat Reference         |                           |                      | User's                                |              |                        | Landsat Reference         |                           |                      | User's                                |
|            |              | # pixels               | Water                     | Non-water                 | Overalls             | Accuracy                              |              | # pixels               | Water                     | Non-water                 | Overalls             | Accuracy                              |
|            | S2<br>Result | Water                  | 2008815<br>(2034546)      | 355<br>(25181)            | 2009170<br>(2059727) | <b>99.98%</b><br>(98.78%)             | S2<br>Result | Water                  | 2142465<br>(2213602)      | 32293<br>(167590)         | 2174758<br>(2381192) | <b>98.52%</b><br>(92.96%)             |
|            |              | Non-water              | 154967<br>(219912)        | 611901<br>(917682)        | 766868<br>(1137594)  | <b>79.79%</b><br>(80.67%)             |              | Non-water              | 21317<br>(40856)          | 579963<br>(775273)        | 601280<br>(816129)   | <b>96.45%</b><br>(94.99%)             |
|            |              | Overalls               | 2163782<br>(2254458)      | 612256<br>(942863)        | 2776038<br>(3197321) |                                       |              | Overalls               | 2163782<br>(2254458)      | 612256<br>(942863)        | 2776038<br>(3197321) |                                       |
|            |              | Producer's<br>Accuracy | <b>92.84%</b><br>(90.25%) | <b>99.94%</b><br>(97.33%) |                      | Overall:<br><b>94.40%</b><br>(92.33%) |              | Producer's<br>Accuracy | <b>99.01%</b><br>(98.19%) | <b>94.73%</b><br>(82.23%) |                      | Overall:<br><b>98.07%</b><br>(93.48%) |
| 01/06/2017 |              |                        | Landsat Reference         |                           |                      | User's                                |              |                        | Landsat Reference         |                           |                      | User's                                |
|            |              | # pixels               | Water                     | Non-water                 | Overalls             | Accuracy                              |              | # pixels               | Water                     | Non-water                 | Overalls             | Accuracy                              |
|            | S2<br>Result | Water                  | 1138689<br>(1193504)      | 793<br>(33548)            | 1139482<br>(1227052) | <b>99.93%</b><br>(97.27%)             | S2<br>Result | Water                  | 1279534<br>(1382705)      | 16855<br>(116316)         | 1296389<br>(1499021) | <b>98.70%</b><br>(92.24%)             |
|            |              | Non-water              | 150583<br>(230030)        | 1508216<br>(1740239)      | 1658799<br>(1970269) | <b>90.92%</b><br>(88.32%)             |              | Non-water              | 9738<br>(40829)           | 1492154<br>(1657471)      | 1501892<br>(1698300) | <b>99.35%</b><br>(97.60%)             |
|            |              | Overalls               | 1289272<br>(1423534)      | 1509009<br>(1773787)      | 2798281<br>(3197321) |                                       |              | Overalls               | 1289272<br>(1423534)      | 1509009<br>(1773787)      | 2798281<br>(3197321) |                                       |
|            |              | Producer's<br>Accuracy | <b>88.32%</b><br>(83.84%) | <b>99.95%</b><br>(98.11%) |                      | Overall:<br><b>94.59%</b><br>(91.76%) |              | Producer's<br>Accuracy | <b>99.24%</b><br>(97.13%) | <b>98.88%</b><br>(93.44%) |                      | Overall:<br><b>99.05%</b><br>(95.09%) |

### 3. Results for Rice-paddies

The following table contains the confusion matrices used to generate the results given in Table 6 of main manuscript and Table 3 of Sup2. The confusion matrices of both Table 6 and Table 3, are given in the same cells, with the results used to produce Table 3 given into parentheses. The results that are finally transferred to Table 6 and Table 3 are denoted with bold. In the first row is given the applied approach and the considered study area and in the left column the date.

|            | Unsupervised – Rice-paddies |                        |                           |                           |                      |                                       | Supervised – Rice-paddies |                        |                           |                           |                      |                                       |
|------------|-----------------------------|------------------------|---------------------------|---------------------------|----------------------|---------------------------------------|---------------------------|------------------------|---------------------------|---------------------------|----------------------|---------------------------------------|
| 29/12/2015 |                             |                        | Landsat Reference         |                           |                      | User's                                |                           |                        | Landsat Reference         |                           |                      | User's                                |
|            |                             | # pixels               | Water                     | Non-water                 | Overalls             | Accuracy                              |                           | # pixels               | Water                     | Non-water                 | Overalls             | Accuracy                              |
|            | S2<br>Result                | Water                  | 1240440<br>(1254359)      | 370<br>(33349)            | 1240810<br>(1287708) | <b>99.97%</b><br>(97.41%)             | S2<br>Result              | Water                  | 1342242<br>(1365620)      | 13832<br>(101222)         | 1356074<br>(1466842) | <b>98.98%</b><br>(93.10%)             |
|            |                             | Non-water              | 106746<br>(122078)        | 683393<br>(780580)        | 790139<br>(902658)   | <b>86.49%</b><br>(86.48%)             |                           | Non-water              | 4944<br>(10817)           | 669931<br>(712707)        | 674875<br>(723524)   | <b>99.27%</b><br>(98.50%)             |
|            |                             | Overalls               | 1347186<br>(1376437)      | 683763<br>(813929)        | 2030949<br>(2190366) |                                       |                           | Overalls               | 1347186<br>(1376437)      | 683763<br>(813929)        | 2030949<br>(2190366) |                                       |
|            |                             | Producer's<br>Accuracy | <b>92.08%</b><br>(91.13%) | <b>99.95%</b><br>(95.90%) |                      | Overall:<br><b>94.73%</b><br>(92.90%) |                           | Producer's<br>Accuracy | <b>99.63%</b><br>(99.21%) | <b>97.98%</b><br>(87.56%) |                      | Overall:<br><b>99.08%</b><br>(94.88%) |
| 06/06/2016 |                             |                        | Landsat Reference         |                           |                      | User's                                |                           |                        | Landsat Reference         |                           |                      | User's                                |
|            |                             | # pixels               | Water                     | Non-water                 | Overalls             | Accuracy                              |                           | # pixels               | Water                     | Non-water                 | Overalls             | Accuracy                              |
|            | S2<br>Result                | Water                  | 671776<br>(734720)        | 2856<br>(53484)           | 674632<br>(788204)   | <b>99.58%</b><br>(93.21%)             | S2<br>Result              | Water                  | 703332<br>(788538)        | 15549<br>(106024)         | 718881<br>(894562)   | <b>97.84%</b><br>(88.15%)             |
|            |                             | Non-water              | 38162<br>(79961)          | 1154279<br>(1322201)      | 1192441<br>(1402162) | <b>96.80%</b><br>(94.30%)             |                           | Non-water              | 6606<br>(26143)           | 1141586<br>(1269661)      | 1148192<br>(1295804) | <b>99.42%</b><br>(97.98%)             |
|            |                             | Overalls               | 709938<br>(814681)        | 1157135<br>(1375685)      | 1867073<br>(2190366) |                                       |                           | Overalls               | 709938<br>(814681)        | 1157135<br>(1375685)      | 1867073<br>(2190366) |                                       |
|            |                             | Producer's<br>Accuracy | <b>94.62%</b><br>(90.18%) | <b>99.75%</b><br>(96.11%) |                      | Overall:<br><b>97.80%</b><br>(93.91%) |                           | Producer's<br>Accuracy | <b>99.07%</b><br>(96.79%) | <b>98.66%</b><br>(92.29%) |                      | Overall:<br><b>98.81%</b><br>(93.97%) |
| 1          |                             |                        | Landsat Reference         |                           |                      | User's                                |                           |                        | Landsat Reference         |                           |                      | User's                                |

|            |           | # pixels            | Water                            | Non-water                        | Overalls             | Accuracy                                     |           | # pixels            | Water                            | Non-water                        | Overalls             | Accuracy                                     |
|------------|-----------|---------------------|----------------------------------|----------------------------------|----------------------|----------------------------------------------|-----------|---------------------|----------------------------------|----------------------------------|----------------------|----------------------------------------------|
|            | S2 Result | Water               | 656258<br>(767759)               | 275430<br>(428599)               | 931688<br>(1196358)  | <b>70.44%</b><br><b>(64.17%)</b>             | S2 Result | Water               | 751544<br>(880648)               | 15348<br>(152646)                | 766892<br>(1033294)  | <b>98.00%</b><br><b>(85.23%)</b>             |
|            |           | Non-water           | 103867<br>(160667)               | 688859<br>(833341)               | 792726<br>(994008)   | <b>86.90%</b><br><b>(83.84%)</b>             |           | Non-water           | 8581<br>(47778)                  | 948941<br>(1109294)              | 957522<br>(1157072)  | <b>99.10%</b><br><b>(95.87%)</b>             |
|            |           | Overalls            | 760125<br>(928426)               | 964289<br>(1261940)              | 1724414<br>(2190366) |                                              |           | Overalls            | 760125<br>(928426)               | 964289<br>(1261940)              | 1724414<br>(2190366) |                                              |
|            |           | Producer's Accuracy | <b>86.34%</b><br><b>(82.69%)</b> | <b>71.44%</b><br><b>(66.04%)</b> |                      | Overall:<br><b>78.00%</b><br><b>(73.10%)</b> |           | Producer's Accuracy | <b>98.87%</b><br><b>(94.85%)</b> | <b>98.41%</b><br><b>(87.90%)</b> |                      | Overall:<br><b>98.61%</b><br><b>(90.85%)</b> |
|            |           |                     |                                  |                                  |                      |                                              |           |                     |                                  |                                  |                      |                                              |
| 25/08/2016 |           |                     | Landsat Reference                |                                  |                      | User's Accuracy                              |           |                     | Landsat Reference                |                                  |                      | User's Accuracy                              |
|            |           | # pixels            | Water                            | Non-water                        | Overalls             |                                              |           | # pixels            | Water                            | Non-water                        | Overalls             |                                              |
|            | S2 Result | Water               | 683781<br>(879145)               | 213237<br>(498087)               | 897018<br>(1377232)  | <b>76.23%</b><br><b>(63.83%)</b>             | S2 Result | Water               | 697744<br>(892237)               | 102181<br>(374488)               | 799925<br>(1266725)  | <b>87.23%</b><br><b>(70.44%)</b>             |
|            |           | Non-water           | 29269<br>(58643)                 | 652040<br>(754491)               | 681309<br>(813134)   | <b>95.70%</b><br><b>(92.79%)</b>             |           | Non-water           | 15306<br>(45551)                 | 763096<br>(878090)               | 778402<br>(923641)   | <b>98.03%</b><br><b>(95.07%)</b>             |
|            |           | Overalls            | 713050<br>(937788)               | 865277<br>(1252578)              | 1578327<br>(2190366) |                                              |           | Overalls            | 713050<br>(937788)               | 865277<br>(1252578)              | 1578327<br>(2190366) |                                              |
|            |           | Producer's Accuracy | <b>95.90%</b><br><b>(93.75%)</b> | <b>75.36%</b><br><b>(60.24%)</b> |                      | Overall:<br><b>84.64%</b><br><b>(74.58%)</b> |           | Producer's Accuracy | <b>97.85%</b><br><b>(95.14%)</b> | <b>88.19%</b><br><b>(70.10%)</b> |                      | Overall:<br><b>92.56%</b><br><b>(80.82%)</b> |
| 04/10/2016 |           |                     | Landsat Reference                |                                  |                      | User's Accuracy                              |           |                     | Landsat Reference                |                                  |                      | User's Accuracy                              |
|            |           | # pixels            | Water                            | Non-water                        | Overalls             |                                              |           | # pixels            | Water                            | Non-water                        | Overalls             |                                              |
|            | S2 Result | Water               | 6001<br>(9499)                   | 73<br>(2490)                     | 6074<br>(11989)      | <b>98.80%</b><br><b>(79.23%)</b>             | S2 Result | Water               | 11313<br>(19058)                 | 3955<br>(11099)                  | 15268<br>(30157)     | <b>74.10%</b><br><b>(63.20%)</b>             |
|            |           | Non-water           | 6685<br>(17795)                  | 2133125<br>(2160582)             | 2139810<br>(2178377) | <b>99.69%</b><br><b>(99.18%)</b>             |           | Non-water           | 1373<br>(8236)                   | 2129243<br>(2151973)             | 2130616<br>(2160209) | <b>99.94%</b><br><b>(99.62%)</b>             |
|            |           | Overalls            | 12686<br>(27294)                 | 2133198<br>(2163072)             | 2145884<br>(2190366) |                                              |           | Overalls            | 12686<br>(27294)                 | 2133198<br>(2163072)             | 2145884<br>(2190366) |                                              |
|            |           | Producer's Accuracy | <b>47.30%</b><br><b>(34.80%)</b> | <b>99.99%</b><br><b>(99.88%)</b> |                      | Overall:<br><b>99.69%</b><br><b>(99.07%)</b> |           | Producer's Accuracy | <b>89.18%</b><br><b>(69.82%)</b> | <b>99.81%</b><br><b>(99.49%)</b> |                      | Overall:<br><b>99.75%</b><br><b>(99.12%)</b> |
| 23/12/2016 |           |                     | Landsat Reference                |                                  |                      | User's Accuracy                              |           |                     | Landsat Reference                |                                  |                      | User's Accuracy                              |
|            |           | # pixels            | Water                            | Non-water                        | Overalls             |                                              |           | # pixels            | Water                            | Non-water                        | Overalls             |                                              |
|            | S2 Result | Water               | 1146044<br>(1154328)             | 252<br>(44081)                   | 1146296<br>(1198409) | <b>99.98%</b><br><b>(96.32%)</b>             | S2 Result | Water               | 1375214<br>(1402882)             | 22525<br>(186146)                | 1397739<br>(1589028) | <b>98.39%</b><br><b>(88.29%)</b>             |
|            |           | Non-water           | 247072<br>(277664)               | 476288<br>(714293)               | 723360<br>(991957)   | <b>65.84%</b><br><b>(72.01%)</b>             |           | Non-water           | 17902<br>(29110)                 | 454015<br>(572228)               | 471917<br>(601338)   | <b>96.21%</b><br><b>(95.16%)</b>             |
|            |           | Overalls            | 1393116<br>(1431992)             | 476540<br>(758374)               | 1869656<br>(2190366) |                                              |           | Overalls            | 1393116<br>(1431992)             | 476540<br>(758374)               | 1869656<br>(2190366) |                                              |
|            |           | Producer's Accuracy | <b>82.26%</b><br><b>(80.61%)</b> | <b>99.95%</b><br><b>(94.19%)</b> |                      | Overall:<br><b>86.77%</b><br><b>(85.31%)</b> |           | Producer's Accuracy | <b>98.71%</b><br><b>(97.97%)</b> | <b>95.27%</b><br><b>(75.45%)</b> |                      | Overall:<br><b>97.84%</b><br><b>(90.17%)</b> |
| 01/06/2017 |           |                     | Landsat Reference                |                                  |                      | User's Accuracy                              |           |                     | Landsat Reference                |                                  |                      | User's Accuracy                              |
|            |           | # pixels            | Water                            | Non-water                        | Overalls             |                                              |           | # pixels            | Water                            | Non-water                        | Overalls             |                                              |
|            | S2 Result | Water               | 1338181<br>(1356166)             | 802<br>(33328)                   | 1338983<br>(1389494) | <b>99.94%</b><br><b>(97.60%)</b>             | S2 Result | Water               | 1402071<br>(1428617)             | 6901<br>(68236)                  | 1408972<br>(1496853) | <b>99.51%</b><br><b>(95.44%)</b>             |
|            |           | Non-water           | 68265<br>(86004)                 | 637650<br>(714293)               | 705915<br>(800872)   | <b>90.33%</b><br><b>(89.26%)</b>             |           | Non-water           | 4375<br>(13553)                  | 631551<br>(679960)               | 635926<br>(693513)   | <b>99.31%</b><br><b>(98.05%)</b>             |
|            |           | Overalls            | 1406446<br>(1442170)             | 638452<br>(748196)               | 2044898<br>(2190366) |                                              |           | Overalls            | 1406446<br>(1442170)             | 638452<br>(748196)               | 2044898<br>(2190366) |                                              |
|            |           | Producer's Accuracy | <b>95.15%</b><br><b>(94.04%)</b> | <b>99.87%</b><br><b>(95.55%)</b> |                      | Overall:<br><b>96.62%</b><br><b>(94.55%)</b> |           | Producer's Accuracy | <b>99.69%</b><br><b>(99.06%)</b> | <b>98.92%</b><br><b>(90.88%)</b> |                      | Overall:<br><b>99.45%</b><br><b>(96.27%)</b> |

#### 4. Results for Temporary Ponds

The following table contains the confusion matrices used to generate the results given in Table 7 of main manuscript and Table 4 of Sup2. The confusion matrices of both Table 7 and Table 4, are given in the same cells, with the results used to produce Table 4 given into parentheses. The results that are finally transferred to Table 7 and Table 4 are denoted with bold. In the first row is given the applied approach and the considered study area and in the left column the date.

|            | Unsupervised – Temporary Ponds |                        |                                  |                                  |                      |                                              | Supervised – Temporary Ponds |                        |                                   |                                  |                      |                                              |
|------------|--------------------------------|------------------------|----------------------------------|----------------------------------|----------------------|----------------------------------------------|------------------------------|------------------------|-----------------------------------|----------------------------------|----------------------|----------------------------------------------|
| 29/12/2015 |                                |                        | Landsat Reference                |                                  |                      | User's                                       |                              |                        | Landsat Reference                 |                                  |                      | User's                                       |
|            |                                | # pixels               | Water                            | Non-water                        | Overalls             | Accuracy                                     |                              | # pixels               | Water                             | Non-water                        | Overalls             | Accuracy                                     |
|            | S2<br>Result                   | Water                  | 1616<br>(2507)                   | 326<br>(887)                     | 1942<br>(3394)       | <b>83.21%</b><br><b>(73.87%)</b>             | S2<br>Result                 | Water                  | 1678<br>(2739)                    | 1328<br>(2204)                   | 3006<br>(4943)       | <b>55.82%</b><br><b>(55.41%)</b>             |
|            |                                | Non-water              | 121<br>(1979)                    | 2744656<br>(2753183)             | 2744777<br>(2755162) | <b>99.99%</b><br><b>(99.93%)</b>             |                              | Non-water              | 59<br>(1747)                      | 2743654<br>(2751866)             | 2743713<br>(2753613) | <b>99.99%</b><br><b>(99.94%)</b>             |
|            |                                | Overalls               | 1737<br>(4486)                   | 2744982<br>(2754070)             | 2746719<br>(2758556) |                                              |                              | Overalls               | 1737<br>(4486)                    | 2744982<br>(2754070)             | 2746719<br>(2758556) |                                              |
|            |                                | Producer's<br>Accuracy | <b>93.03%</b><br><b>(55.88%)</b> | <b>99.99%</b><br><b>(99.97%)</b> |                      | Overall:<br><b>99.98%</b><br><b>(99.90%)</b> |                              | Producer's<br>Accuracy | <b>96.60%</b><br><b>(61.06%)</b>  | <b>99.95%</b><br><b>(99.92%)</b> |                      | Overall:<br><b>99.95%</b><br><b>(99.86%)</b> |
| 06/06/2016 |                                |                        | Landsat Reference                |                                  |                      | User's                                       |                              |                        | Landsat Reference                 |                                  |                      | User's                                       |
|            |                                | # pixels               | Water                            | Non-water                        | Overalls             | Accuracy                                     |                              | # pixels               | Water                             | Non-water                        | Overalls             | Accuracy                                     |
|            | S2<br>Result                   | Water                  | 2426<br>(3973)                   | 1276<br>(2119)                   | 3702<br>(6092)       | <b>65.53%</b><br><b>(65.22%)</b>             | S2<br>Result                 | Water                  | 2455<br>(4182)                    | 1629<br>(2840)                   | 4084<br>(7022)       | <b>60.11%</b><br><b>(59.56%)</b>             |
|            |                                | Non-water              | 148<br>(1445)                    | 2745986<br>(2751019)             | 2746134<br>(2752464) | <b>99.99%</b><br><b>(99.95%)</b>             |                              | Non-water              | 119<br>(1236)                     | 2745633<br>(2750298)             | 2745752<br>(2751534) | <b>99.99%</b><br><b>(99.96%)</b>             |
|            |                                | Overalls               | 2574<br>(5418)                   | 2747262<br>(2753138)             | 2749836<br>(2758556) |                                              |                              | Overalls               | 2574<br>(5418)                    | 2747262<br>(2753138)             | 2749836<br>(2758556) |                                              |
|            |                                | Producer's<br>Accuracy | <b>94.25%</b><br><b>(73.33%)</b> | <b>99.95%</b><br><b>(99.92%)</b> |                      | Overall:<br><b>99.95%</b><br><b>(99.87%)</b> |                              | Producer's<br>Accuracy | <b>95.38%</b><br><b>(77.19%)</b>  | <b>99.94%</b><br><b>(99.90%)</b> |                      | Overall:<br><b>99.94%</b><br><b>(99.85%)</b> |
| 16/07/2016 |                                |                        | Landsat Reference                |                                  |                      | User's                                       |                              |                        | Landsat Reference                 |                                  |                      | User's                                       |
|            |                                | # pixels               | Water                            | Non-water                        | Overalls             | Accuracy                                     |                              | # pixels               | Water                             | Non-water                        | Overalls             | Accuracy                                     |
|            | S2<br>Result                   | Water                  | 1382<br>(2176)                   | 2733<br>(3000)                   | 4115<br>(5176)       | <b>33.58%</b><br><b>(42.04%)</b>             | S2<br>Result                 | Water                  | 1418<br>(2319)                    | 2837<br>(3262)                   | 4255<br>(5581)       | <b>33.33%</b><br><b>(41.55%)</b>             |
|            |                                | Non-water              | 49<br>(695)                      | 2750254<br>(2752685)             | 2750303<br>(2753380) | <b>99.99%</b><br><b>(99.97%)</b>             |                              | Non-water              | 13<br>(552)                       | 2750150<br>(2752423)             | 2750163<br>(2752975) | <b>99.99%</b><br><b>(99.98%)</b>             |
|            |                                | Overalls               | 1431<br>(2871)                   | 2752987<br>(2755685)             | 2754418<br>(2758556) |                                              |                              | Overalls               | 1431<br>(2871)                    | 2752987<br>(2755685)             | 2754418<br>(2758556) |                                              |
|            |                                | Producer's<br>Accuracy | <b>96.58%</b><br><b>(75.79%)</b> | <b>99.90%</b><br><b>(99.89%)</b> |                      | Overall:<br><b>99.90%</b><br><b>(99.87%)</b> |                              | Producer's<br>Accuracy | <b>99.09%</b><br><b>(80.77%)</b>  | <b>99.90%</b><br><b>(99.88%)</b> |                      | Overall:<br><b>99.90%</b><br><b>(99.86%)</b> |
| 25/08/2016 |                                |                        | Landsat Reference                |                                  |                      | User's                                       |                              |                        | Landsat Reference                 |                                  |                      | User's                                       |
|            |                                | # pixels               | Water                            | Non-water                        | Overalls             | Accuracy                                     |                              | # pixels               | Water                             | Non-water                        | Overalls             | Accuracy                                     |
|            | S2<br>Result                   | Water                  | 597<br>(1008)                    | 1954<br>(2224)                   | 2551<br>(3232)       | <b>23.40%</b><br><b>(31.19%)</b>             | S2<br>Result                 | Water                  | 626<br>(1121)                     | 2305<br>(2593)                   | 2931<br>(3714)       | <b>21.36%</b><br><b>(30.18%)</b>             |
|            |                                | Non-water              | 33<br>(396)                      | 2753614<br>(2754928)             | 2753647<br>(2755324) | <b>99.99%</b><br><b>(99.99%)</b>             |                              | Non-water              | 4<br>(283)                        | 2753263<br>(2754559)             | 2753267<br>(2754842) | <b>99.99%</b><br><b>(99.99%)</b>             |
|            |                                | Overalls               | 630<br>(1404)                    | 2755568<br>(2757152)             | 2756198<br>(2758556) |                                              |                              | Overalls               | 630<br>(1404)                     | 2755568<br>(2757152)             | 2756198<br>(2758556) |                                              |
|            |                                | Producer's<br>Accuracy | <b>94.76%</b><br><b>(71.79%)</b> | <b>99.93%</b><br><b>(99.92%)</b> |                      | Overall:<br><b>99.93%</b><br><b>(99.91%)</b> |                              | Producer's<br>Accuracy | <b>99.37%</b><br><b>(79.84%)</b>  | <b>99.92%</b><br><b>(99.91%)</b> |                      | Overall:<br><b>99.92%</b><br><b>(99.90%)</b> |
| 04/10/2016 |                                |                        | Landsat Reference                |                                  |                      | User's                                       |                              |                        | Landsat Reference                 |                                  |                      | User's                                       |
|            |                                | # pixels               | Water                            | Non-water                        | Overalls             | Accuracy                                     |                              | # pixels               | Water                             | Non-water                        | Overalls             | Accuracy                                     |
|            | S2<br>Result                   | Water                  | 301<br>(529)                     | 2156<br>(2251)                   | 2457<br>(2780)       | <b>12.25%</b><br><b>(19.03%)</b>             | S2<br>Result                 | Water                  | 306<br>(547)                      | 2669<br>(2830)                   | 2975<br>(3377)       | <b>10.29%</b><br><b>(16.20%)</b>             |
|            |                                | Non-water              | 5<br>(353)                       | 2753575<br>(2755423)             | 2753580<br>(2755776) | <b>99.99%</b><br><b>(99.99%)</b>             |                              | Non-water              | 0<br>(335)                        | 2753062<br>(2754844)             | 2753062<br>(2755179) | <b>100.00%</b><br><b>(99.99%)</b>            |
|            |                                | Overalls               | 306<br>(882)                     | 2755731<br>(2757674)             | 2756037<br>(2758556) |                                              |                              | Overalls               | 306<br>(882)                      | 2755731<br>(2757674)             | 2756037<br>(2758556) |                                              |
|            |                                | Producer's<br>Accuracy | <b>98.37%</b><br><b>(59.98%)</b> | <b>99.92%</b><br><b>(99.92%)</b> |                      | Overall:<br><b>99.92%</b><br><b>(99.91%)</b> |                              | Producer's<br>Accuracy | <b>100.00%</b><br><b>(62.02%)</b> | <b>99.90%</b><br><b>(99.90%)</b> |                      | Overall:<br><b>99.90%</b><br><b>(99.89%)</b> |
| 23/12/2016 |                                |                        | Landsat Reference                |                                  |                      | User's                                       |                              |                        | Landsat Reference                 |                                  |                      | User's                                       |
|            |                                | # pixels               | Water                            | Non-water                        | Overalls             | Accuracy                                     |                              | # pixels               | Water                             | Non-water                        | Overalls             | Accuracy                                     |
|            | S2<br>Result                   | Water                  | 3183<br>(5133)                   | 387<br>(1187)                    | 3570<br>(6320)       | <b>89.16%</b><br><b>(81.22%)</b>             | S2<br>Result                 | Water                  | 3635<br>(6756)                    | 2621<br>(4902)                   | 6256<br>(11658)      | <b>58.10%</b><br><b>(57.95%)</b>             |
|            |                                | Non-water              | 840<br>(7615)                    | 2720151<br>(2744621)             | 2720991<br>(2752236) | <b>99.97%</b><br><b>(99.72%)</b>             |                              | Non-water              | 388<br>(5992)                     | 2717917<br>(2740906)             | 2718305<br>(2746898) | <b>99.99%</b><br><b>(99.78%)</b>             |

|            |              | Overalls               | 4023<br>(12748)           | 2720538<br>(2745808)      | 2724561<br>(2758556) |                                       |              | Overalls               | 4023<br>(12748)           | 2720538<br>(2745808)      | 2724561<br>(2758556) |                                       |
|------------|--------------|------------------------|---------------------------|---------------------------|----------------------|---------------------------------------|--------------|------------------------|---------------------------|---------------------------|----------------------|---------------------------------------|
|            |              | Producer's<br>Accuracy | <b>79.12%</b><br>(40.27%) | <b>99.99%</b><br>(99.96%) |                      | Overall:<br><b>99.95%</b><br>(99.68%) |              | Producer's<br>Accuracy | <b>90.36%</b><br>(53.00%) | <b>99.90%</b><br>(99.82%) |                      | Overall:<br><b>99.89%</b><br>(99.61%) |
| 01/06/2017 |              |                        | Landsat Reference         |                           |                      | User's<br>Accuracy                    |              |                        | Landsat Reference         |                           |                      | User's<br>Accuracy                    |
|            |              | # pixels               | Water                     | Non-water                 | Overalls             |                                       |              | # pixels               | Water                     | Non-water                 | Overalls             |                                       |
|            | S2<br>Result | Water                  | 3279<br>(4943)            | 2695<br>(3541)            | 5974<br>(8484)       | <b>54.89%</b><br>(58.26%)             | S2<br>Result | Water                  | 3431<br>(5571)            | 2316<br>(3849)            | 5747<br>(9420)       | <b>59.70%</b><br>(59.14%)             |
|            |              | Non-water              | 276<br>(2212)             | 2741119<br>(2747860)      | 2741395<br>(2750072) | <b>99.99%</b><br>(99.92%)             |              | Non-water              | 124<br>(1584)             | 2741498<br>(2747552)      | 2741622<br>(2749136) | <b>99.99%</b><br>(99.94%)             |
|            |              | Overalls               | 3555<br>(7155)            | 2743814<br>(2751401)      | 2747369<br>(2758556) |                                       |              | Overalls               | 3555<br>(7155)            | 2743814<br>(2751401)      | 2747369<br>(2758556) |                                       |
|            |              | Producer's<br>Accuracy | <b>92.24%</b><br>(69.08%) | <b>99.90%</b><br>(99.87%) |                      | Overall:<br><b>99.89%</b><br>(99.79%) |              | Producer's<br>Accuracy | <b>96.51%</b><br>(77.86%) | <b>99.92%</b><br>(99.86%) |                      | Overall:<br><b>99.91%</b><br>(99.80%) |

## 5. Combined Accuracy Results

The following table contains the confusion matrices used to generate the results given in Table 8 of main manuscript and Table 5 of Sup2. The confusion matrices of both Table 8 and Table 5, are given in the same cells, with the results used to produce Table 5 given into parentheses. The results that are finally transferred to Table 8 and Table 5 are denoted with bold. In the first row is given the applied approach and in the left column the considered study area.

|                                                                           | Unsupervised |                        |                           |                           |                          |                                       | Supervised   |                        |                           |                           |                          |                                       |
|---------------------------------------------------------------------------|--------------|------------------------|---------------------------|---------------------------|--------------------------|---------------------------------------|--------------|------------------------|---------------------------|---------------------------|--------------------------|---------------------------------------|
| Complete Area<br>(Unsupervised results are<br>for the case of using MCET) |              |                        | Landsat Reference         |                           |                          | User's<br>Accuracy                    |              |                        | Landsat Reference         |                           |                          | User's<br>Accuracy                    |
|                                                                           |              | # pixels               | Water                     | Non-water                 | Overalls                 |                                       |              | # pixels               | Water                     | Non-<br>water             | Overalls                 |                                       |
|                                                                           | S2<br>Result | Water                  | 18180582<br>(19465461)    | 2270643<br>(3723677)      | 20451225<br>(23189138)   | <b>88.90%</b><br>(83.94%)             | S2<br>Result | Water                  | 19928140<br>(21791643)    | 1718792<br>(4233046)      | 21646932<br>(26024689)   | <b>92.06%</b><br>(83.73%)             |
|                                                                           |              | Non-water              | 1968645<br>(3225683)      | 162341744<br>(166552959)  | 164310389<br>(169778642) | <b>98.80%</b><br>(98.10%)             |              | Non-water              | 221087<br>(899501)        | 162893595<br>(166043590)  | 163114682<br>(166943091) | <b>99.86%</b><br>(99.46%)             |
|                                                                           |              | Overalls               | 20149227<br>(22691144)    | 164612387<br>(170276636)  | 184761614<br>(192967780) |                                       |              | Overalls               | 20149227<br>(22691144)    | 164612387<br>(170276636)  | 184761614<br>(192967780) |                                       |
|                                                                           |              | Producer's<br>Accuracy | <b>90.23%</b><br>(85.78%) | <b>98.62%</b><br>(97.81%) |                          | Overall:<br><b>97.71%</b><br>(96.40%) |              | Producer's<br>Accuracy | <b>98.90%</b><br>(96.04%) | <b>98.96%</b><br>(97.51%) |                          | Overall:<br><b>98.95%</b><br>(97.34%) |
| Marshland                                                                 |              |                        | Landsat Reference         |                           |                          | User's<br>Accuracy                    |              |                        | Landsat Reference         |                           |                          | User's<br>Accuracy                    |
|                                                                           |              | # pixels               | Water                     | Non-water                 | Overalls                 |                                       |              | # pixels               | Water                     | Non-<br>water             | Overalls                 |                                       |
|                                                                           | S2<br>Result | Water                  | 3846450<br>(4016298)      | 9036<br>(118201)          | 3855486<br>(4134499)     | <b>99.77%</b><br>(97.14%)             | S2<br>Result | Water                  | 4182645<br>(4497161)      | 71424<br>(426913)         | 4254069<br>(4924074)     | <b>98.32%</b><br>(91.33%)             |
|                                                                           |              | Non-water              | 374000<br>(614925)        | 16801962<br>(17631819)    | 17175962<br>(18246744)   | <b>97.82%</b><br>(96.63%)             |              | Non-water              | 37805<br>(134062)         | 16739574<br>(17323107)    | 16777379<br>(17457169)   | <b>99.77%</b><br>(99.23%)             |
|                                                                           |              | Overalls               | 4220450<br>(4631223)      | 16810998<br>(17750020)    | 21031448<br>(22381243)   |                                       |              | Overalls               | 4220450<br>(4631223)      | 16810998<br>(17750020)    | 21031448<br>(22381243)   |                                       |
|                                                                           |              | Producer's<br>Accuracy | <b>91.14%</b><br>(86.72%) | <b>99.95%</b><br>(99.33%) |                          | Overall:<br><b>98.18%</b><br>(96.72%) |              | Producer's<br>Accuracy | <b>99.10%</b><br>(97.11%) | <b>99.58%</b><br>(97.59%) |                          | Overall:<br><b>99.48%</b><br>(97.49%) |
| Rice-paddies                                                              |              |                        | Landsat Reference         |                           |                          | User's<br>Accuracy                    |              |                        | Landsat Reference         |                           |                          | User's<br>Accuracy                    |
|                                                                           |              | # pixels               | Water                     | Non-water                 | Overalls                 |                                       |              | # pixels               | Water                     | Non-<br>water             | Overalls                 |                                       |
|                                                                           | S2<br>Result | Water                  | 5742481<br>(6155976)      | 493020<br>(1093418)       | 6235501<br>(7249394)     | <b>92.09%</b><br>(84.92%)             | S2<br>Result | Water                  | 6283460<br>(6777600)      | 180291<br>(999861)        | 6463751<br>(7777461)     | <b>97.21%</b><br>(87.14%)             |
|                                                                           |              | Non-water              | 600066<br>(802812)        | 6425634<br>(7280356)      | 7025700<br>(8083168)     | <b>91.46%</b><br>(90.07%)             |              | Non-water              | 59087<br>(181188)         | 6738363<br>(7373913)      | 6797450<br>(7555101)     | <b>99.13%</b><br>(97.60%)             |
|                                                                           |              | Overalls               | 6342547<br>(6958788)      | 6918654<br>(8373774)      | 13261201<br>(15332562)   |                                       |              | Overalls               | 6342547<br>(6958788)      | 6918654<br>(8373774)      | 13261201<br>(15332562)   |                                       |

|                                                                           |           |                     |                        |                          |                          |                                 |           |                     |                    |                        |                        |                                |
|---------------------------------------------------------------------------|-----------|---------------------|------------------------|--------------------------|--------------------------|---------------------------------|-----------|---------------------|--------------------|------------------------|------------------------|--------------------------------|
|                                                                           |           | Producer's Accuracy | 90.54%<br>(88.46%)     | 92.87%<br>(86.94%)       |                          | Overall:<br>91.76%<br>(87.63%)  |           | Producer's Accuracy | 99.07%<br>(97.40%) | 97.39%<br>(88.06%)     |                        | Overall:<br>98.19%<br>(92.30%) |
| Temporary Ponds                                                           |           |                     | Landsat Reference      |                          |                          | User's Accuracy                 |           |                     | Landsat Reference  |                        |                        | User's Accuracy                |
|                                                                           |           | # pixels            | Water                  | Non-water                | Overalls                 |                                 |           | # pixels            | Water              | Non-water              | Overalls               |                                |
|                                                                           | S2 Result | Water               | 12784<br>(20269)       | 11527<br>(15209)         | 24311<br>(35478)         | 52.59%<br>(57.13%)              | S2 Result | Water               | 13549<br>(23235)   | 15705<br>(22480)       | 29254<br>(45715)       | 46.32%<br>(50.83%)             |
|                                                                           |           | Non-water           | 1472<br>(14695)        | 19209355<br>(19259719)   | 19210827<br>(19274414)   | 99.99%<br>(99.92%)              |           | Non-water           | 707<br>(11729)     | 19205177<br>(19252448) | 19205884<br>(19264177) | 99.99%<br>(99.94%)             |
|                                                                           |           | Overalls            | 14256<br>(34964)       | 19220882<br>(19274928)   | 19235138<br>(19309892)   |                                 |           | Overalls            | 14256<br>(34964)   | 19220882<br>(19274928) | 19235138<br>(19309892) |                                |
|                                                                           |           | Producer's Accuracy | 89.67%<br>(57.97%)     | 99.94%<br>(99.92%)       |                          | Overall:<br>99.93 %<br>(99.85%) |           | Producer's Accuracy | 95.04%<br>(66.45%) | 99.92%<br>(99.88%)     |                        | Overall:<br>99.91%<br>(99.82%) |
| Complete Area<br>(Unsupervised results are<br>for the case of using Otsu) |           |                     | Landsat Reference      |                          |                          | User's Accuracy                 |           |                     |                    |                        |                        |                                |
|                                                                           |           | # pixels            | Water                  | Non-water                | Overalls                 |                                 |           |                     |                    |                        |                        |                                |
|                                                                           | S2 Result | Water               | 18979790<br>(20610963) | 5832828<br>(7923528)     | 24812618<br>(28534491)   | 76.49%<br>(72.23%)              |           |                     |                    |                        |                        |                                |
|                                                                           |           | Non-water           | 1169437<br>(2080181)   | 158779559<br>(162353108) | 159948996<br>(164433289) | 99.27%<br>(98.73%)              |           |                     |                    |                        |                        |                                |
|                                                                           |           | Overalls            | 20149227<br>(22691144) | 164612387<br>(170276636) | 184761614<br>(192967780) |                                 |           |                     |                    |                        |                        |                                |
|                                                                           |           | Producer's Accuracy | 94.20%<br>(90.83%)     | 96.46%<br>(95.35%)       |                          | Overall:<br>96.21%<br>(94.82%)  |           |                     |                    |                        |                        |                                |
